# Supplementary material for: A series of novel ion-pair complexes based on TCNQ: syntheses, crystal structures and properties
Source: Royal Society of Chemistry journal article supplement (doi:10.1039/b808390h), 2008-01-01
Supplement: b808390h.pdf [file b808390h.pdf]

## Supplementary Information for:

### A Series of Novel Ion-pair Complexes Based on TCNQ: Syntheses, Crystal Structures and Properties

Guang-Xiang Liu<sup>\*a</sup>, Heng Xu<sup>a</sup>, Xiao-Ming Ren<sup>a</sup> and Wei-Yin Sun<sup>\*b</sup>

<sup>a</sup>Anhui Key Laboratory of Functional Coordination Compounds, School of Chemistry and Chemical Engineering, Anqing Normal University, Anqing 246003, P. R. China

<sup>b</sup>Coordination Chemistry Institute, State Key Laboratory of Coordination Chemistry, School of Chemistry and Chemical Engineering, Nanjing University, Nanjing 210093, P. R. China

E-mail: [liugx@live.com](mailto:liugx@live.com)

**Table 1S.** Distance [ $\text{\AA}$ ] and angles [ $^\circ$ ] of hydrogen bonding for complexes **1** – **4**

| D-H...A                                       | $d(\text{D-H})$ | $d(\text{H...A})$ | $d(\text{D...A})$ | $\angle(\text{DHA})$ |
|-----------------------------------------------|-----------------|-------------------|-------------------|----------------------|
| <b>(AP)(TCNQ) (1)</b>                         |                 |                   |                   |                      |
| N2-H2A...N3#1                                 | 0.86            | 2.42              | 2.991(3)          | 125                  |
| N2-H2B...N5#2                                 | 0.86            | 2.23              | 3.025(3)          | 154                  |
| C9-H9...N6#3                                  | 0.93            | 2.58              | 3.215(3)          | 126                  |
| <b>(CP)<sub>2</sub>(TCNQ)<sub>3</sub> (2)</b> |                 |                   |                   |                      |
| C12-H12...N6#4                                | 0.93            | 2.47              | 3.157(3)          | 131                  |

|                                                                |      |      |          |     |
|----------------------------------------------------------------|------|------|----------|-----|
| C21-H21···N6#5                                                 | 0.93 | 2.59 | 3.367(3) | 141 |
| <b>(CMP)(TCNQ) (3)</b>                                         |      |      |          |     |
| C9-H9···N4#6                                                   | 0.93 | 2.57 | 3.331(3) | 139 |
| C12-H12···N2                                                   | 0.93 | 2.47 | 3.338(3) | 155 |
| C13-H13B···N5#7                                                | 0.96 | 2.59 | 3.452(4) | 150 |
| <b>(BQ)<sub>2</sub>(TCNQ)<sub>2</sub>·CH<sub>3</sub>CN (4)</b> |      |      |          |     |
| C7-H7A···N3#8                                                  | 0.93 | 2.57 | 3.331(3) | 139 |
| C8-H8···N3#8                                                   | 0.93 | 2.47 | 3.338(3) | 155 |
| C8-H8···N5                                                     | 0.96 | 2.59 | 3.452(4) | 150 |

Symmetry codes: #1 x, -1+y, z; #2 -x, 1-y, 2-z; #3 -x, -1/2+y, 3/2-z; #4 2-x, 1-y, 1-z;  
#5 -1+x, y, z; #6 -x, -1/2+y, 1/2-z; #7 1-x, -1/2+y, 1/2-z; #8 x, -1+y, z.

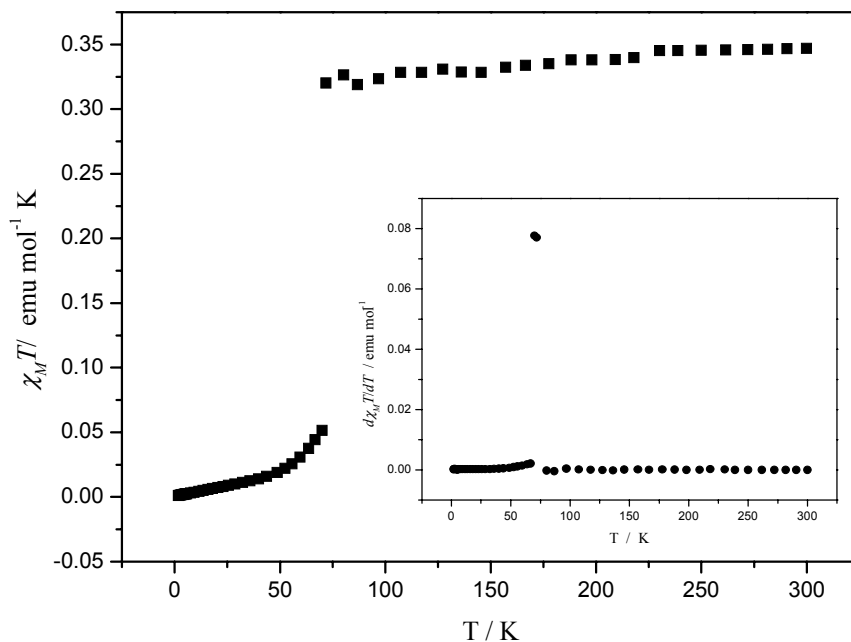

**Figure S1.** The plot of  $\chi_M T$  versus  $T$  for complex **3** (inset:  $d(\chi_M T)/dT$  versus  $T$ ).

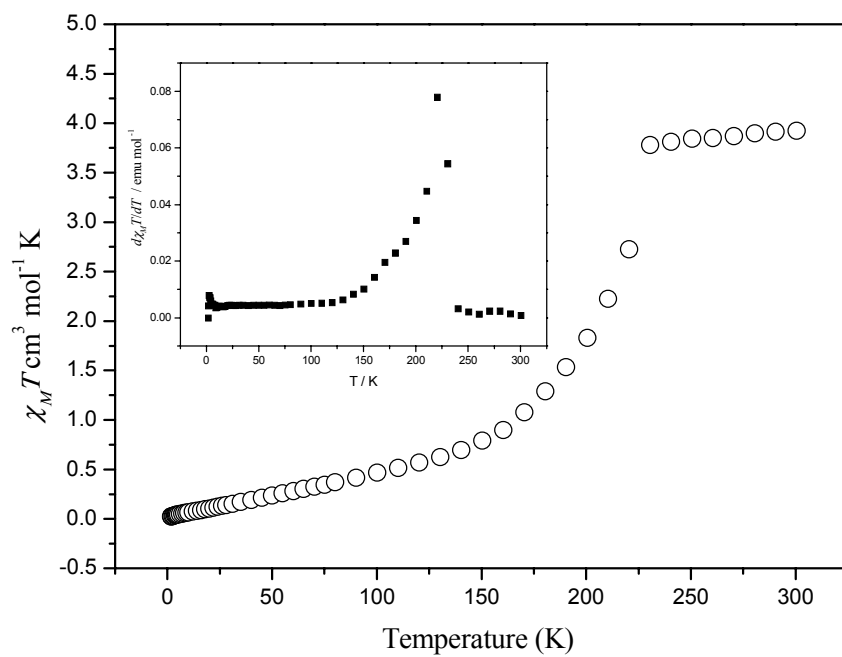

**Figure S2.** The plot of  $\chi_M T$  versus  $T$  for complex **4** (inset:  $d(\chi_M T)/dT$  versus  $T$ ).

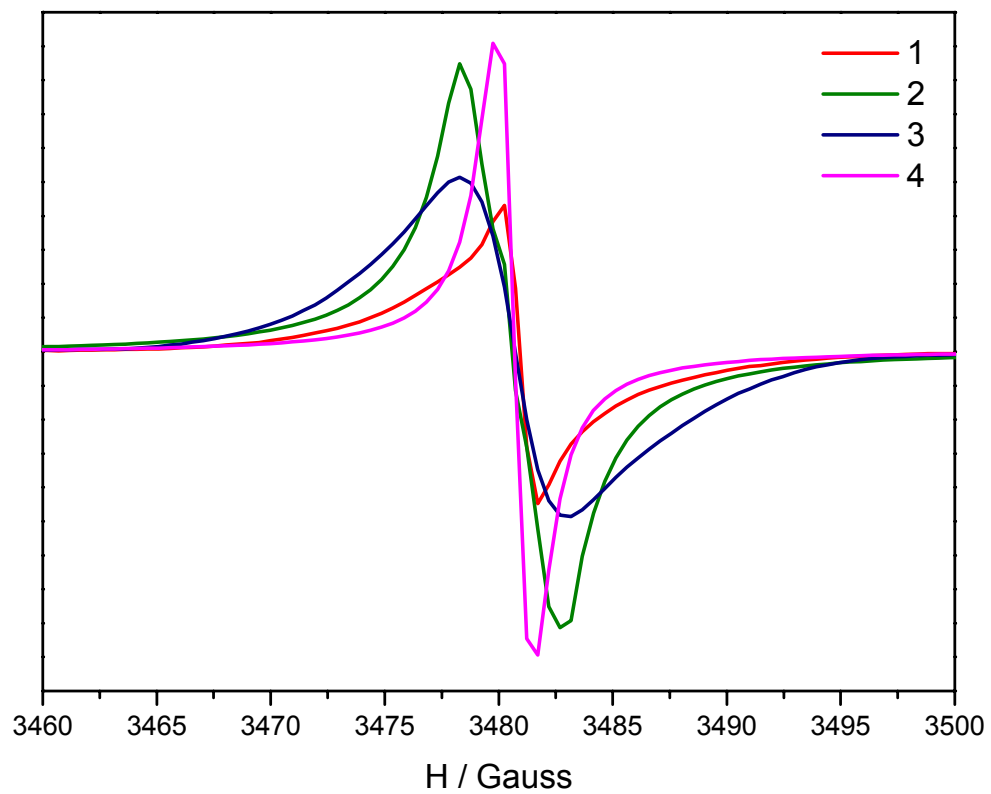

**Figure S3.** EPR spectra of **1** - **4** at room temperature.
